# Supplementary material for: Knowledge, attitudes and behaviours related to dietary salt among adults in the state of Victoria, Australia 2015
Source: PubMed Central journal article supplement (PMC5450045; doi:10.1186/s12889-017-4451-0), 2017-05-30
Supplement: 12889_2017_4451_MOESM1_ESM.pdf [file 12889_2017_4451_MOESM1_ESM.pdf]

## Victorian Survey – Knowledge, Attitudes and Behaviours related to Dietary Salt Intake

Thank you for taking the time to complete this survey. There are two sections to this survey. Please answer each question by selecting the most suitable option.

All responses on this survey will remain anonymous.

### SECTION ONE – DEMOGRAPHIC INFORMATION

*In this section we are interested in finding out a little bit of background information about you. This information will help us compare the answers of respondents from different backgrounds.*

Q1. What is your sex? *Source: [1]*

|        |
|--------|
| Male   |
| Female |

Q2. What is your age in complete years? *Source: [1]*

\_\_\_\_\_

Q3. In which country were you born? *Source: [2]*

|                                                                   |
|-------------------------------------------------------------------|
| Australia (includes External Territories)                         |
| United Kingdom (incl. England, Scotland, Wales, Northern Ireland) |
| New Zealand                                                       |
| Italy                                                             |
| Greece                                                            |
| China                                                             |
| Vietnam                                                           |
| Lebanon                                                           |
| Other, please specify<br>_____                                    |
| Don't know                                                        |
| Prefer not to answer                                              |

Q4. Do you speak a language other than English at home?

*(If more than one language, indicate the one that is spoken most often) Source: [2]*

|                  |
|------------------|
| No, English only |
| Yes, Italian     |
| Yes, Greek       |
| Yes, Cantonese   |
| Yes, Mandarin    |

|                                      |
|--------------------------------------|
| Yes, Arabic                          |
| Yes, Vietnamese                      |
| Yes, German                          |
| Yes, Spanish                         |
| Yes, Tagalog (Filipino)              |
| Yes, Other (please specify)<br>_____ |
| Don't know                           |
| Prefer not to answer                 |

Q5. What is the postcode of your residential address?

\_\_\_\_\_

Q6. What is the highest level of education and training you have completed? *Source: [2]*

|                                                                                                                                  |
|----------------------------------------------------------------------------------------------------------------------------------|
| Never attended school                                                                                                            |
| Some primary school                                                                                                              |
| Completed primary school                                                                                                         |
| Some high school (i.e Year 7 to Year 11, Form 1 to Form 5)                                                                       |
| Completed high school (i.e. Year 12, Form 6, HSC)                                                                                |
| TAFE or Trade Certificate or Diploma but did not complete Year 12 at secondary school                                            |
| TAFE or Trade Certificate or Diploma and also completed Year 12 at secondary school.                                             |
| University, or some other Tertiary Institute degree, including post university (i.e. postgraduate diploma, Master's degree, PhD) |
| Other, please specify _____                                                                                                      |
| Don't know                                                                                                                       |
| Prefer not to answer                                                                                                             |

Q7. Have you ever been diagnosed with or suffered from one or more of the following conditions?  
(You may select more than one)

|                     |
|---------------------|
| Heart disease       |
| Stroke              |
| High blood pressure |
| Heart attack        |

|                               |
|-------------------------------|
| Other (please specify: _____) |
| Can't recall/ Don't know      |
| No                            |

Q7.1 (if Yes to High blood pressure response)

Do you currently take medication for the control of your blood pressure? *Source: [3]*

|     |
|-----|
| Yes |
| No  |

Q8. Have you ever received any advice from your doctor or a health professional to reduce your intake of salt/sodium and/or salty foods? *Source: [3]*

|              |
|--------------|
| Yes          |
| No           |
| Cant' recall |

Q9. How tall are you without shoes?

You can enter this in cm or feet and inches. **Only fill in one option.** *Source: [1]*

\_\_\_\_\_ Centimetres (e.g. 165)

OR

\_\_\_\_\_ Feet and inches (e.g. 5 feet 4 inches)

Q10. How much do you weigh without clothes and shoes?

You can enter this in kilograms OR pounds and stones. **Only fill in one option.** *Source: [1]*

\_\_\_\_\_ Kilograms (e.g. 74)

OR

\_\_\_\_\_ Stones and pounds (e.g. 11st 10lbs)

Q11. Are you the main person who does the grocery shopping in your household? *Source [4]*

|                            |
|----------------------------|
| Yes                        |
| No                         |
| I share the responsibility |

## SECTION TWO – YOUR VIEWS ON SALT INTAKE

*[Questions related to knowledge]*

In this section we are interested in finding out more about your views on dietary salt.

Q12. On Australian food products information about the amount of sodium within a food product is displayed on the food label. What is the relationship between salt and sodium? *Source: Modified [5, 4, 6]*

|                           |
|---------------------------|
| They are exactly the same |
| Salt contains sodium      |
| Sodium contains salt      |
| Don't know                |

Q13. In general, how much salt do you think Australians eat? *Source: Modelled of [7, 8]*

|                       |
|-----------------------|
| Far too much          |
| Too much              |
| Just the right amount |
| Too little            |
| Far too little        |
| Don't know            |

Q14. Which of the following do you think is the main source of salt in the Australian diet? *Source: Modelled of [5, 7]*

|                                                               |
|---------------------------------------------------------------|
| Salt added during cooking or at the table                     |
| Salt from processed foods such as breads, sausages and cheese |
| Salt from natural food sources                                |
| Don't know                                                    |

Q15. Health professionals recommend that we should eat no more than a certain amount of salt **each day**. How much salt do you think this is? *Source: Modelled of [4, 6, 9]*

|                                     |
|-------------------------------------|
| 3 grams (about ½ a teaspoon)        |
| 5 grams (about 1 teaspoon)          |
| 8 grams (about 1 and a ½ teaspoons) |
| 10 grams (about 2 teaspoons)        |
| 15 grams (about 3 teaspoons)        |
| Don't know                          |

Q16. How do you think your daily salt intake compares to the amount of salt recommended by health professionals? *Source: Modified [5, 4]* [Note Q16 attitudes questions]

|                                      |
|--------------------------------------|
| I eat less salt than recommended     |
| I eat about the right amount of salt |
| I eat more salt than recommended     |
| I don't know                         |

Q17. Do you think that eating too much salt could damage your health? *Source: [10, 11]*

|            |
|------------|
| Yes        |
| No         |
| Don't know |

Q18. Which, if any, of the following conditions do you think is linked to eating too much salt?

**Please make sure you select an option for each line.** *Source: Modelled of [5, 10, 4, 8]*

| Health problem             | Yes | No | Don't know/Not sure |
|----------------------------|-----|----|---------------------|
| High blood pressure        |     |    |                     |
| Kidney disease             |     |    |                     |
| Heart disease/heart attack |     |    |                     |
| Stroke                     |     |    |                     |
| Stomach cancer             |     |    |                     |

*[Questions related to attitudes]*

Q19. Please indicate on the scale below how concerned you are about each of the following food related issues?

**Please make sure you select an option for each line.** *Source: Modelled of [12, 13]*

|                                           | Not at all concerned | Not very concerned | Somewhat concerned | Very concerned | Extremely concerned |
|-------------------------------------------|----------------------|--------------------|--------------------|----------------|---------------------|
| Healthy eating                            |                      |                    |                    |                |                     |
| The amount of sugar in food               |                      |                    |                    |                |                     |
| The amount of salt in food                |                      |                    |                    |                |                     |
| The amount of fat in food                 |                      |                    |                    |                |                     |
| The amount of saturated fat in food       |                      |                    |                    |                |                     |
| The amount of kilojoules/calories in food |                      |                    |                    |                |                     |

Q20. Please indicate on the scale below how much you agree or disagree with the following statements.

Please make sure you select an option for each line. *Source: Modified [12, 4]*

| Statement                                                                                                                      | Strongly disagree | Disagree | Neither agree nor disagree | Agree | Strongly agree |
|--------------------------------------------------------------------------------------------------------------------------------|-------------------|----------|----------------------------|-------|----------------|
| Himalayan salt, pink salt, sea salt and gourmet salts are healthier than regular table salt                                    |                   |          |                            |       |                |
| I believe salt needs to be added to food to make it tasty                                                                      |                   |          |                            |       |                |
| My health would improve if I reduced the amount of salt in my diet                                                             |                   |          |                            |       |                |
| It is hard to understand sodium information displayed on food labels                                                           |                   |          |                            |       |                |
| When eating out at restaurants/cafes/pubs, I find that lower salt options are not readily available or only in limited variety |                   |          |                            |       |                |
| There should be laws which limit the amount of salt added to manufactured foods                                                |                   |          |                            |       |                |



Q21. From the list below please rate how responsible you think each group is for reducing the amount of salt Australians eat.

Please make sure you select an option for each line. *Source: Modified [14]*

| Group                                           | Not at all responsible | Somewhat responsible | Responsible | Very responsible | Don't know |
|-------------------------------------------------|------------------------|----------------------|-------------|------------------|------------|
| Government                                      |                        |                      |             |                  |            |
| Food manufacturers                              |                        |                      |             |                  |            |
| Business (e.g. supermarkets, local markets)     |                        |                      |             |                  |            |
| Chefs preparing foods in restuarants/pubs/cafes |                        |                      |             |                  |            |
| Friends/family                                  |                        |                      |             |                  |            |
| Yourself                                        |                        |                      |             |                  |            |
| Fast food chains                                |                        |                      |             |                  |            |

*[Questions related to behaviours]*

Q22. How often do you add salt to your food at the table? *Source: [8]*

|            |
|------------|
| Always     |
| Often      |
| Sometimes  |
| Rarely     |
| Never      |
| Don't know |

Q23. In the food you eat at home, how often is salt added during cooking? *Source: [8]*

|            |
|------------|
| Always     |
| Often      |
| Sometimes  |
| Rarely     |
| Never      |
| Don't know |

Q24. Do you place a salt shaker on your table at meal times? *Source: Modified [15]*

|            |
|------------|
| Always     |
| Often      |
| Sometimes  |
| Rarely     |
| Never      |
| Don't know |

Q25. Are you trying to cut down on the amount of salt you eat? *Source: Modified [13, 6, 11, 8]*

|            |
|------------|
| Yes        |
| No         |
| Don't know |

Q26. Below are some common ways to lower the amount of salt in your diet. In the past month, to what extent have you personally done any of the following?

**Please make sure you select an option for each line.** *Source: Modelled from [12, 8]*

|                                                                                                   | Never do this | Rarely do this | Sometimes do this | Often do this | Always do this | Does not apply to me |
|---------------------------------------------------------------------------------------------------|---------------|----------------|-------------------|---------------|----------------|----------------------|
| Looked at a food label to check the salt/sodium content of a food item                            |               |                |                   |               |                |                      |
| Avoided eating packaged, ready-to-eat foods                                                       |               |                |                   |               |                |                      |
| Used spices/herbs instead of salt when cooking                                                    |               |                |                   |               |                |                      |
| Avoided eating food from fast food restaurants (e.g. McDonalds, KFC, Pizza Hut)                   |               |                |                   |               |                |                      |
| Avoided eating food from an Asian style restaurant or takeaway store (e.g. Chinese, Thai, Indian) |               |                |                   |               |                |                      |
| Purchased foods labelled “no added salt”, “salt reduced” or “reduced sodium”                      |               |                |                   |               |                |                      |
| When eating out, asked to have your meal prepared without salt                                    |               |                |                   |               |                |                      |

Q27. On some food products a health star rating is displayed on the food label.

*[insert image of health star rating label]*

Do you use the health star rating information to choose any of the following products?

|                   | Usually | Sometimes | Never | Don't know |
|-------------------|---------|-----------|-------|------------|
| Breakfast cereals |         |           |       |            |
| Cheese            |         |           |       |            |
| Bread             |         |           |       |            |

Q28. Are you aware of VicHealth's initiative to reduce salt intake within the Victorian population?

|            |
|------------|
| Yes        |
| No         |
| Don't know |

Q29. Are you a parent or caregiver for a child or children under the age of 18 years?

|                                  |
|----------------------------------|
| No                               |
| Yes, I'm a parent                |
| Yes, I care for a child/children |

*(if no directed to end of survey)*

**You have completed the Survey! Please hit the submit button.**

**Thank you for your time.**

## References

1. Australian Institute of Health and Welfare. National Health Data Dictionary version 16. Canberra 2012.
2. VicHealth. VicHealth Indicators Survey 2011. 2012. <https://www.vichealth.vic.gov.au/programs-and-projects/vichealth-indicators-survey-2011>. Accessed 23 Sep 2016.
3. Booth A. Implementation strategies and effectiveness of nutritional messages for improving health. Victoria: Deakin University; 2007.
4. Grimes CA, Riddell LJ, Nowson CA. Consumer knowledge and attitudes to salt intake and labelled salt information. *Appetite*. 2009;53(2):189-94.
5. Australian Division of World Action on Salt and Health. 2007 Survey of Australian Consumer Awareness and Practices Relating to Salt Report. 2007. [http://www.awash.org.au/wp-content/uploads/2012/10/AWASH\\_ConsumerSurveyReport\\_2007\\_05\\_15.pdf](http://www.awash.org.au/wp-content/uploads/2012/10/AWASH_ConsumerSurveyReport_2007_05_15.pdf). Accessed 26th May 2015.
6. New Zealand Food Safety Authority. Salt Consumer Survey. 2011. <http://www.foodsafety.govt.nz/elibrary/industry/salt-survey.pdf>. Accessed 26th May 2015.
7. Papadakis S, Pipe AL, Moroz IA, Reid RD, Blanchard CM, Cote DF et al. Knowledge, attitudes and behaviours related to dietary sodium among 35- to 50-year-old Ontario residents. *Can J Cardiol*. 2010;26(5):e164-9.
8. World Health Organization. WHO STEPS Instrument (Core and Expanded) v3.1. 2015. <http://www.who.int/chp/steps/instrument/en/>. Accessed 26th May 2015.
9. Sarmugam R, Worsley A, Flood V. Development and validation of a salt knowledge questionnaire. *Public Health Nutr*. 2014;17(5):1061-8.
10. Consensus Action on Salt and Health. Salt and Your Health. TNS Public Opinion Survey. 2009. <http://www.actiononsalt.org.uk/Docs/33386.pdf>. Accessed 5th Aug 2015.
11. World Health Organization, Pan American Health Organization. Protocol for Population Level Sodium Determination in 24-hr Urine Samples. Canada: WHO/PAHO Regional Expert Group for Cardiovascular Disease Prevention through Population-wide Dietary Salt Reduction 2010.
12. Arcand J, Mendoza J, Qi Y, Henson S, Lou W, L'Abbe MR. Results of a National Survey Examining Canadians' Concern, Actions, Barriers, and Support for Dietary Sodium Reduction Interventions. *Canadian Journal of Cardiology*. 2013;29(5):628-31.
13. Food Standards Agency, COI Communications. Consumer Attitudes to Food Standards Wave 5 - 2004. London 2005.
14. Newson RS, Elmadfa I, Biro G, Cheng Y, Prakash V, Rust P et al. Barriers for progress in salt reduction in the general population. An international study. *Appetite*. 2013;71:22-31.
15. Grimes CA, Baxter JR, Campbell KJ, Riddell LJ, Rigo M, Liem DG et al. Cross-Sectional Study of 24-Hour Urinary Electrolyte Excretion and Associated Health Outcomes in a Convenience Sample of Australian Primary Schoolchildren: The Salt and Other Nutrients in Children (SONIC) Study Protocol. *JMIR Res Protoc*. 2015;4(1):e7.
